# Supplementary figures and images for: Fasting Plasma Glucose Variability and Gastric Cancer Risk in Individuals Without Diabetes Mellitus: A Nationwide Population-Based Cohort Study
Source: PubMed Central journal article supplement — Clin Transl Gastroenterol. 2020 Sep 1;11(9):e00221. doi: 10.14309/ctg.0000000000000221 (PMC7455226; doi:10.14309/ctg.0000000000000221), 2020-09-01

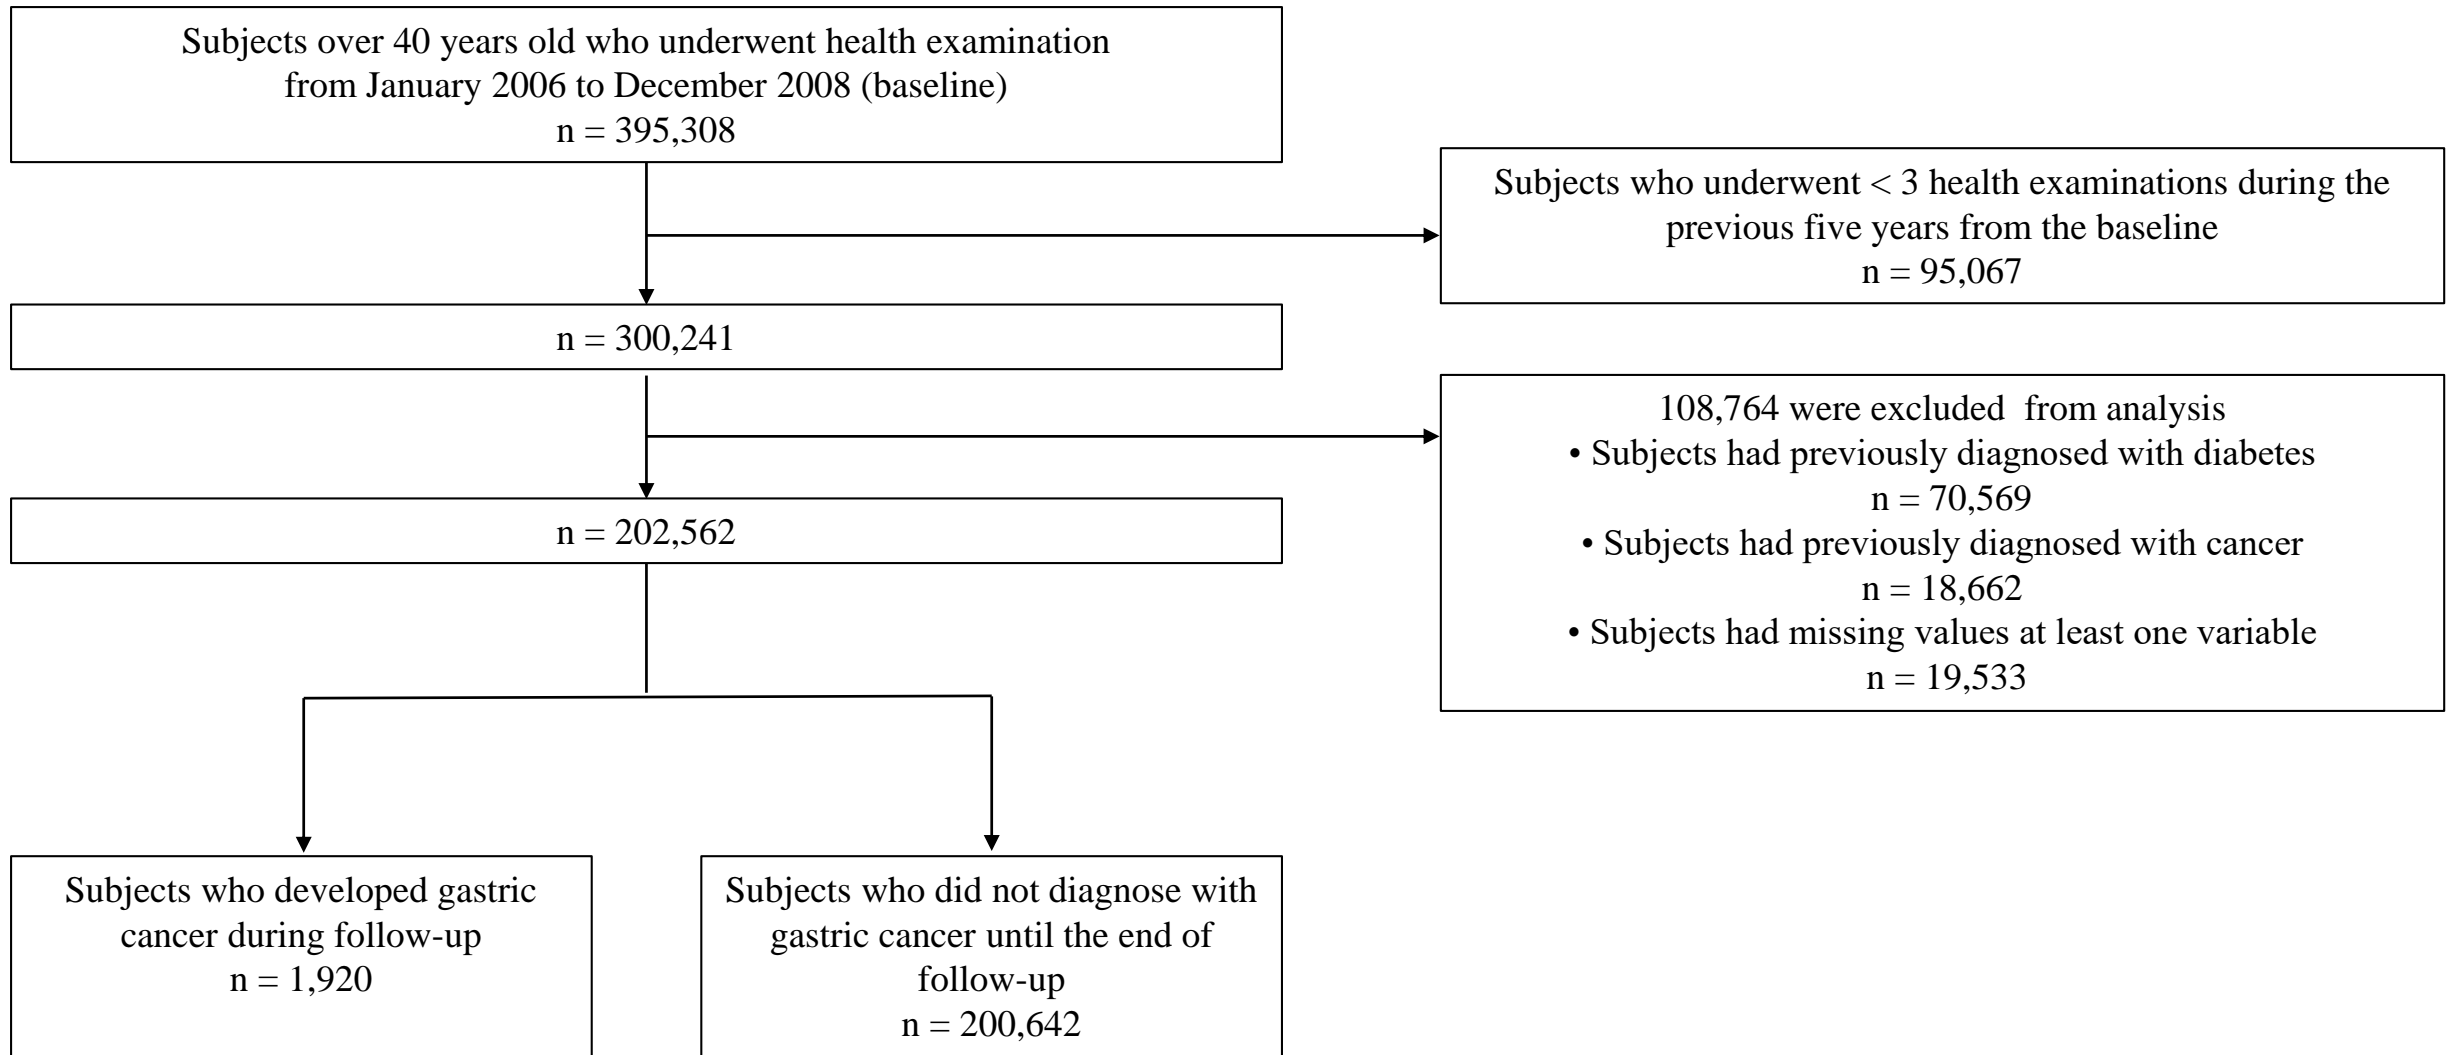

**Supplementary Figure 1. Flow of the study from enrollment to follow-up**

Supplement: ct9-11-e00221-s001.pdf [file ct9-11-e00221-s001.pdf]
